# Supplementary material for: Dimerization of C60˙– in multi-component ionic complexes with bis(ethylenedithio)tetrathiafulvalene: (cation+)2·ET·(C60˙–)2
Source: Royal Society of Chemistry journal article supplement (doi:10.1039/b704371f), 2007-01-01

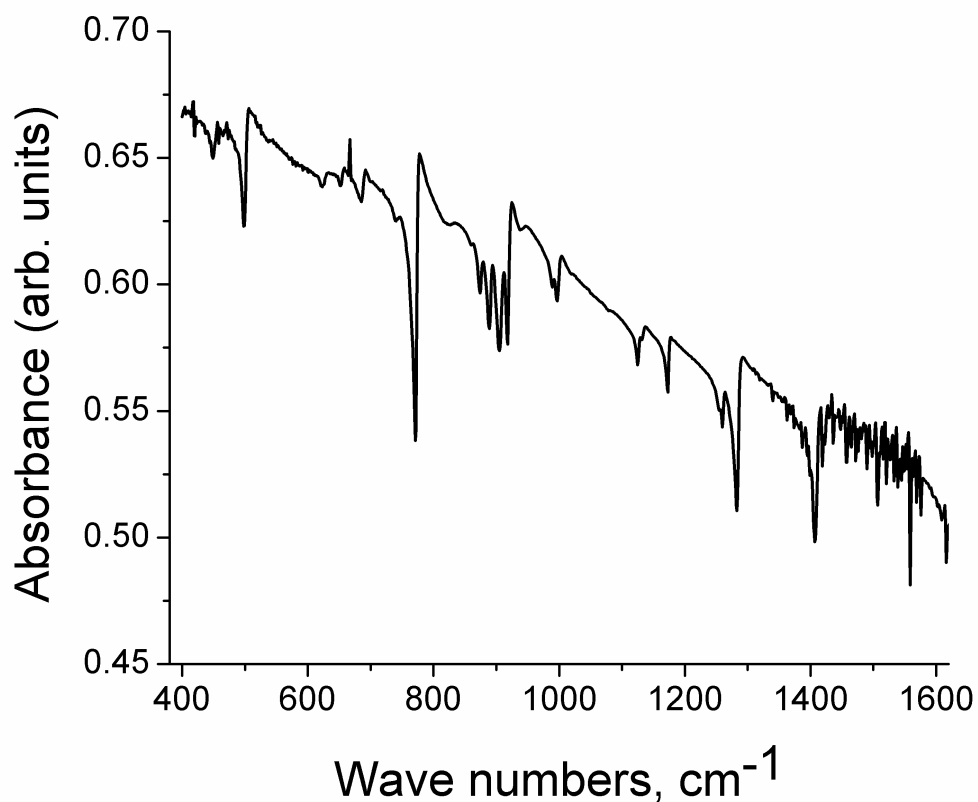

**Fig. S1.** IR-spectrum of ET in KBr pellet: 450, 500, 687, 772, 875, 890, 906, 918, 990, 997, 1126, 1173, 1260, 1284, 1408, 1423, 1509 cm<sup>-1</sup>.

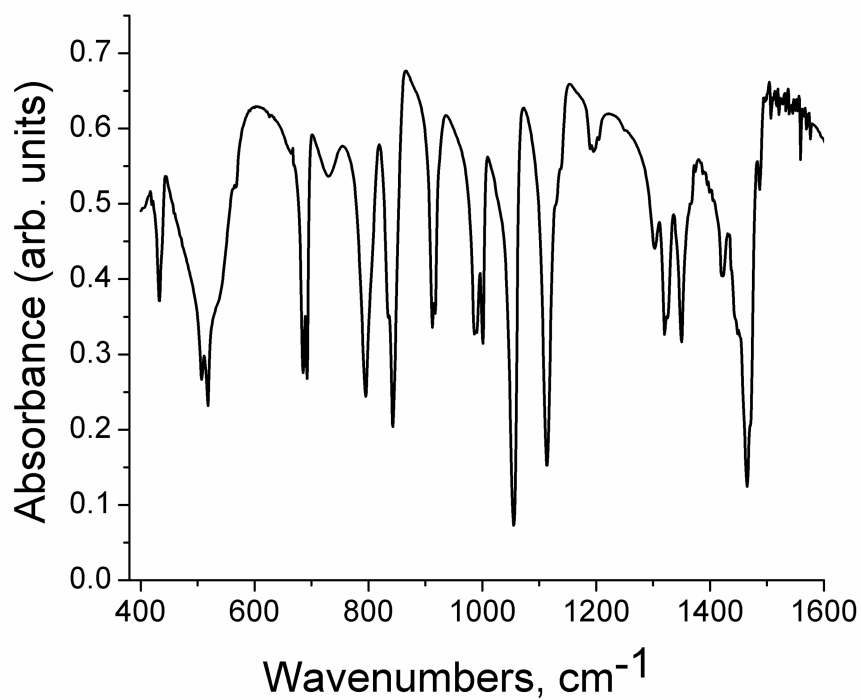

**Fig. S2.** IR-spectrum of MDABCO-I in KBr pellet: 518, 692, 795, 843, 912, 986, 1001, 1055, 1113, 1195, 1303, 1320, 1350, 1465 cm<sup>-1</sup>.

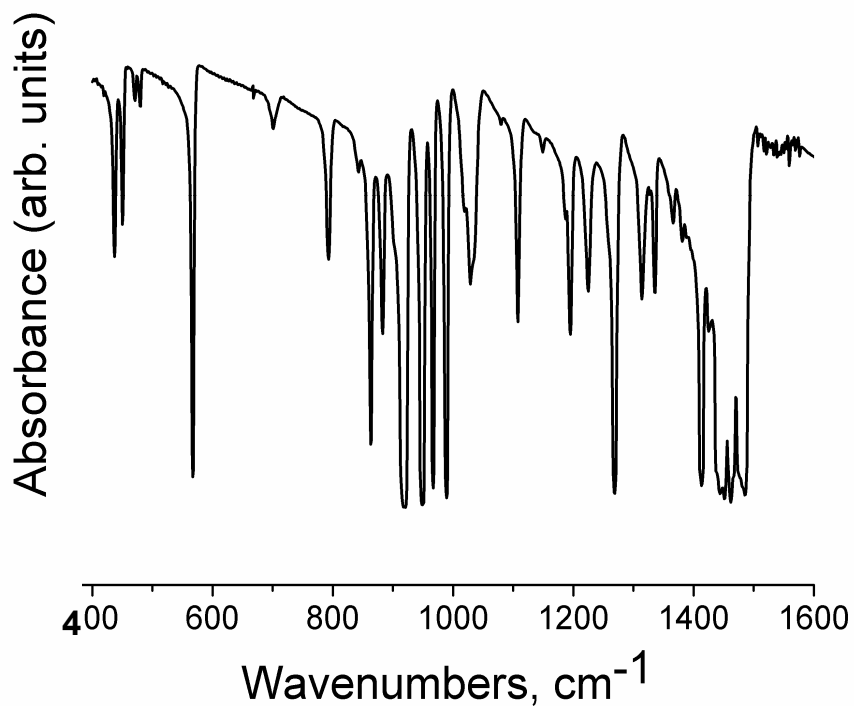

**Fig. S3.** IR-spectrum of DMP-I in KBr pellet: 437, 450, 567, 701, 793, 863, 883, 920, 949, 967, 989, 1029, 1108, 1195, 1225, 1269, 1314, 1366, 1413, 1462, 1485 cm<sup>-1</sup>.

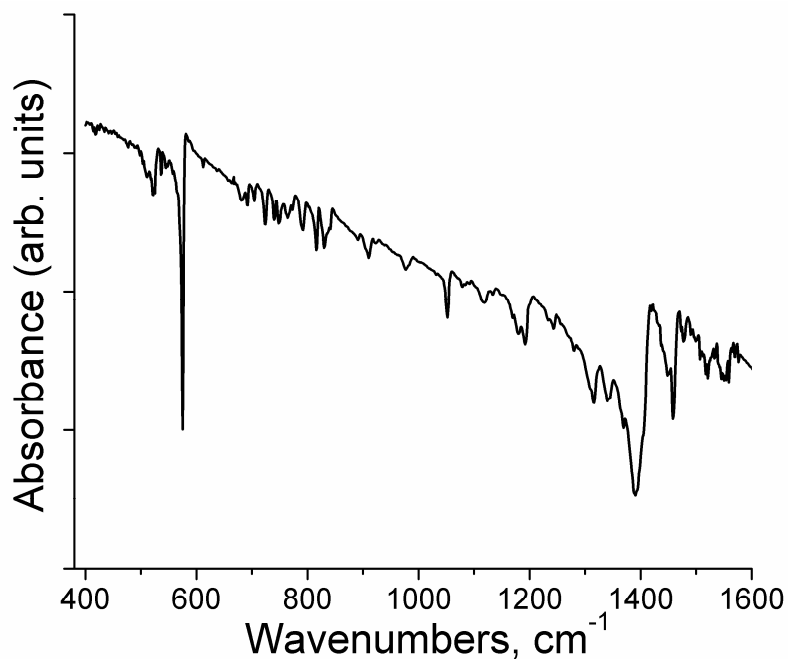

**Fig. S4.** IR-spectrum of **1** in KBr pellet: 681, 692, 522, 525, 575, 748, 764, 792, 816, 830, 910, 924, 977, 1052, 1119, 1170, 1181, 1192, 1280, 1390, 1458 cm<sup>-1</sup>.

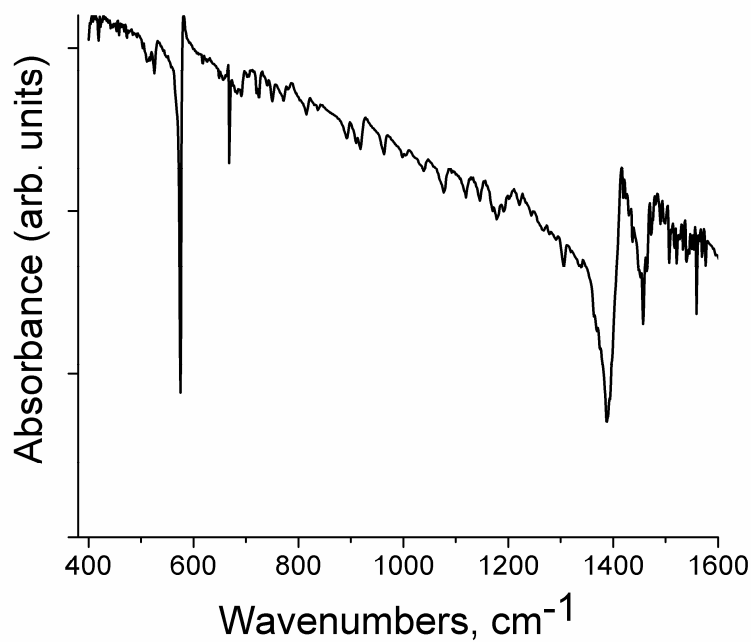

**Fig. S5.** IR-spectrum of **1** in KBr pellet: 525, 575, 680, 683, 750, 772, 815, 836, 910, 1168, 1282, 442, 918, 963, 998, 1038, 1178, 1181, 1192, 1222, 1267, 1268, 1306, 1388, 1457  $\text{cm}^{-1}$ .

#### UV-visible-NIR spectra

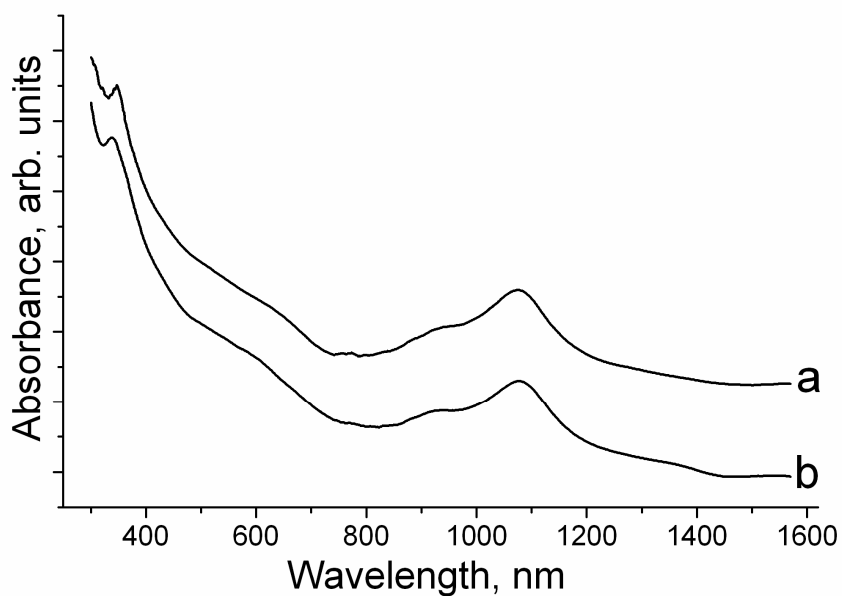

**Fig. S6.** UV-visible-NIR spectra of **1** (a) and **2** (b) at 293 K in KBr pellets.

**EPR spectra.**

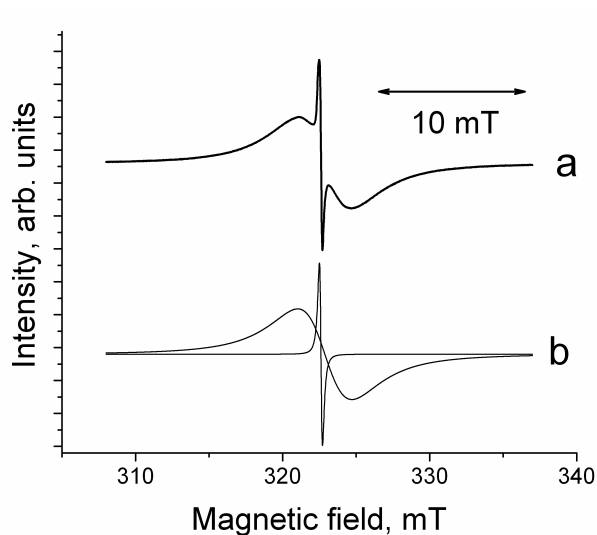

**Fig. S7.** EPR spectrum of **1** at 293 K. Below is shown the fitting of the spectrum by two Lorentzian lines. Narrow signal ( $g = 2.0016$ ,  $\Delta H = 0.21$  mT) is associated with impurities (most probably due to the reduction of  $C_{120}O$  impurity) and its intensity corresponds to the contribution of about 0.5 % from total amount of  $C_{60}$ .

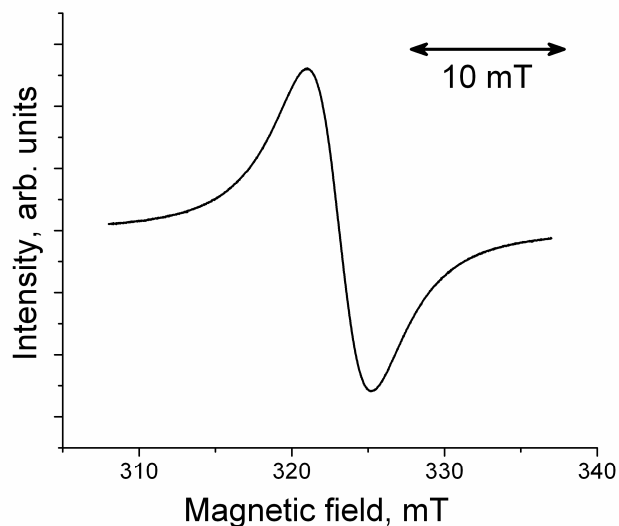

**Fig. S8.** EPR spectrum of **2** at 293 K.

**Changes in the EPR signal of 1 attributed to  $C_{60}^{\bullet-}$  at the dimerization (150-300 K).**

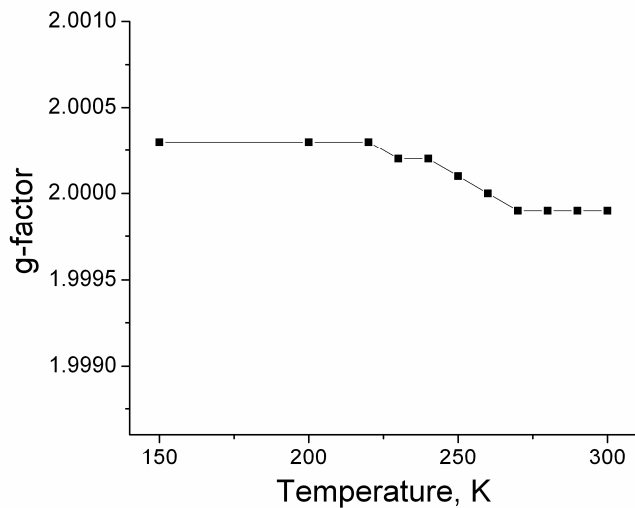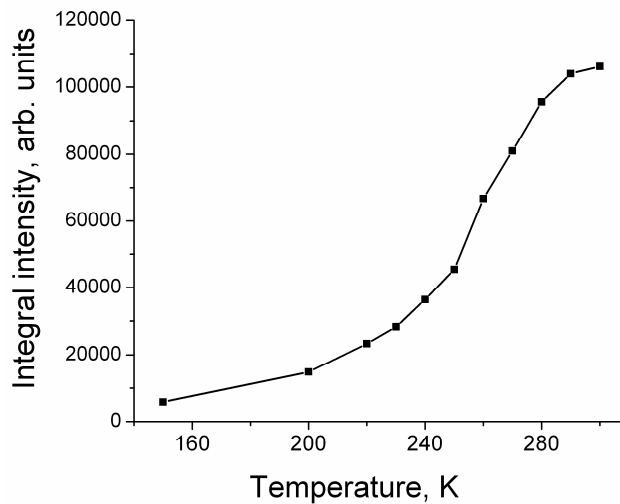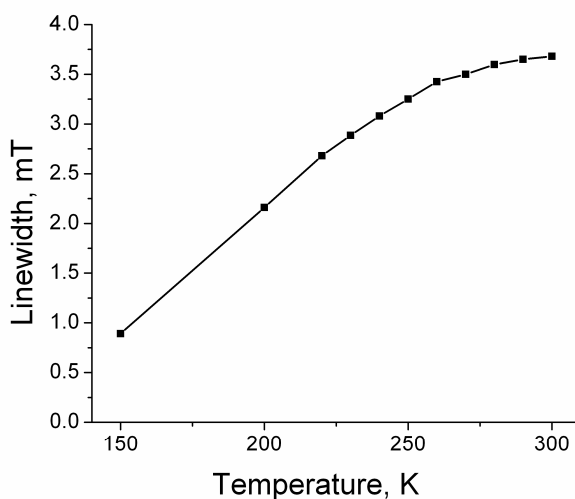

Supplement: b704371f.pdf [file b704371f.pdf]
